# Supplementary material for: Evaluation of Modulatory Activities of Lactobacillus crispatus Strains in the Context of the Vaginal Microbiota
Source: PubMed Central journal article supplement (PMC9045136; doi:10.1128/spectrum.02733-21), 2022-03-10
Supplement: spectrum02733-21_supp_1_seq6.pdf [file spectrum02733-21_supp_1_seq6.pdf]

a)

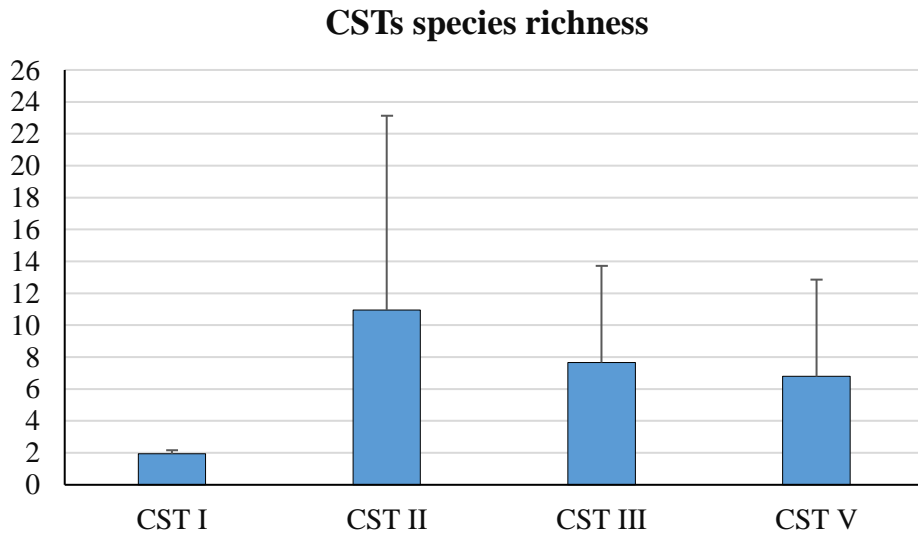

b)

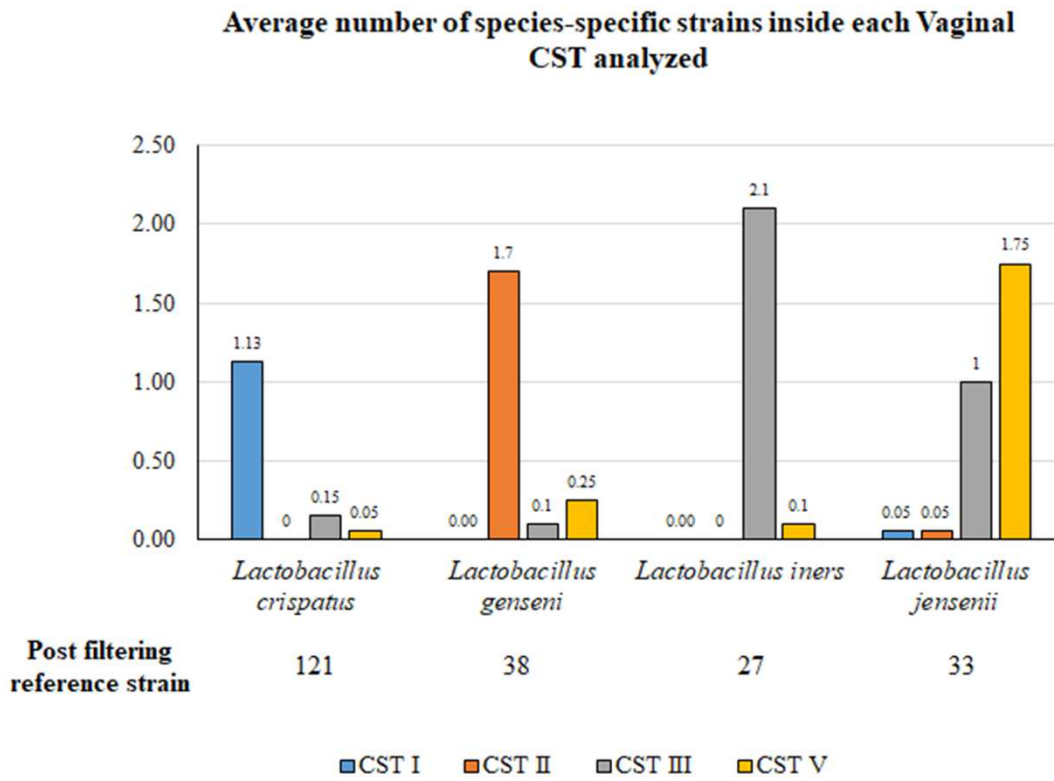

Figure S1

a)

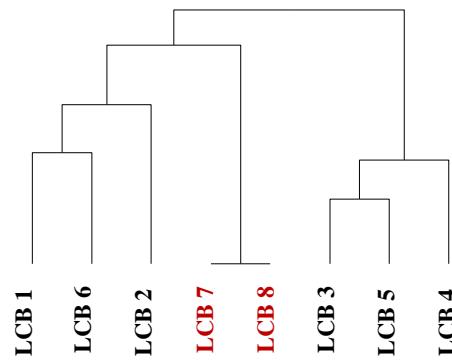

| Probiotic | M247/LB60 | 2 | 1 | 1 | 0 | 0 | 6 | 1 | 0 |
|-----------|-----------|---|---|---|---|---|---|---|---|
| Vaginal   | PRL2021   | 1 | 1 | 1 | 0 | 0 | 6 | 0 | 0 |
| Vaginal   | LB56      | 1 | 0 | 1 | 0 | 0 | 6 | 0 | 0 |
| Vaginal   | LB57      | 2 | 1 | 2 | 0 | 0 | 6 | 1 | 1 |
| Vaginal   | LB58      | 2 | 1 | 1 | 0 | 0 | 6 | 1 | 0 |
| Vaginal   | LB59      | 2 | 0 | 1 | 0 | 0 | 6 | 1 | 1 |
| Vaginal   | LB61      | 2 | 1 | 1 | 0 | 0 | 5 | 1 | 0 |
| Vaginal   | LB62      | 2 | 1 | 1 | 0 | 0 | 6 | 1 | 1 |
| Vaginal   | LB63      | 2 | 1 | 1 | 0 | 0 | 6 | 1 | 1 |
| Chicken   | LB64      | 2 | 1 | 2 | 0 | 0 | 0 | 0 | 0 |
| Chicken   | LB65      | 2 | 1 | 1 | 0 | 0 | 0 | 0 | 0 |
| Chicken   | LB66      | 2 | 1 | 1 | 0 | 0 | 0 | 0 | 0 |
| Chicken   | LB67      | 2 | 1 | 2 | 0 | 0 | 0 | 0 | 0 |
| Chicken   | LB68      | 2 | 1 | 1 | 0 | 0 | 0 | 0 | 0 |
| Chicken   | LB69      | 2 | 1 | 1 | 0 | 0 | 0 | 0 | 0 |
| Chicken   | LB70      | 2 | 1 | 1 | 1 | 1 | 6 | 0 | 0 |

b)

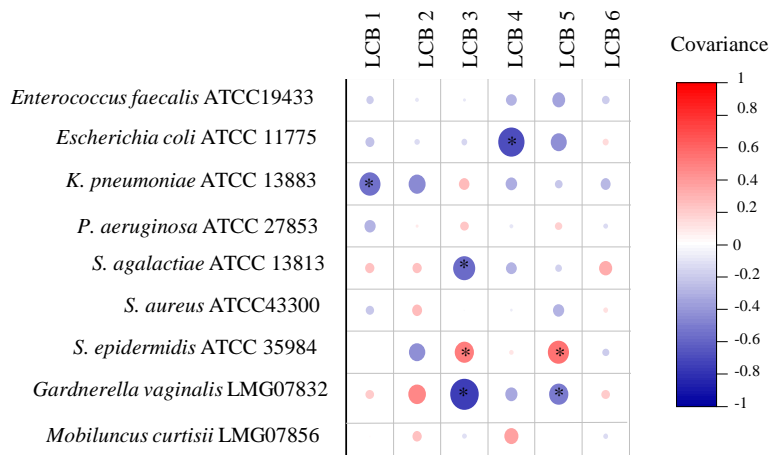

\* p<=0.05

Figure S2

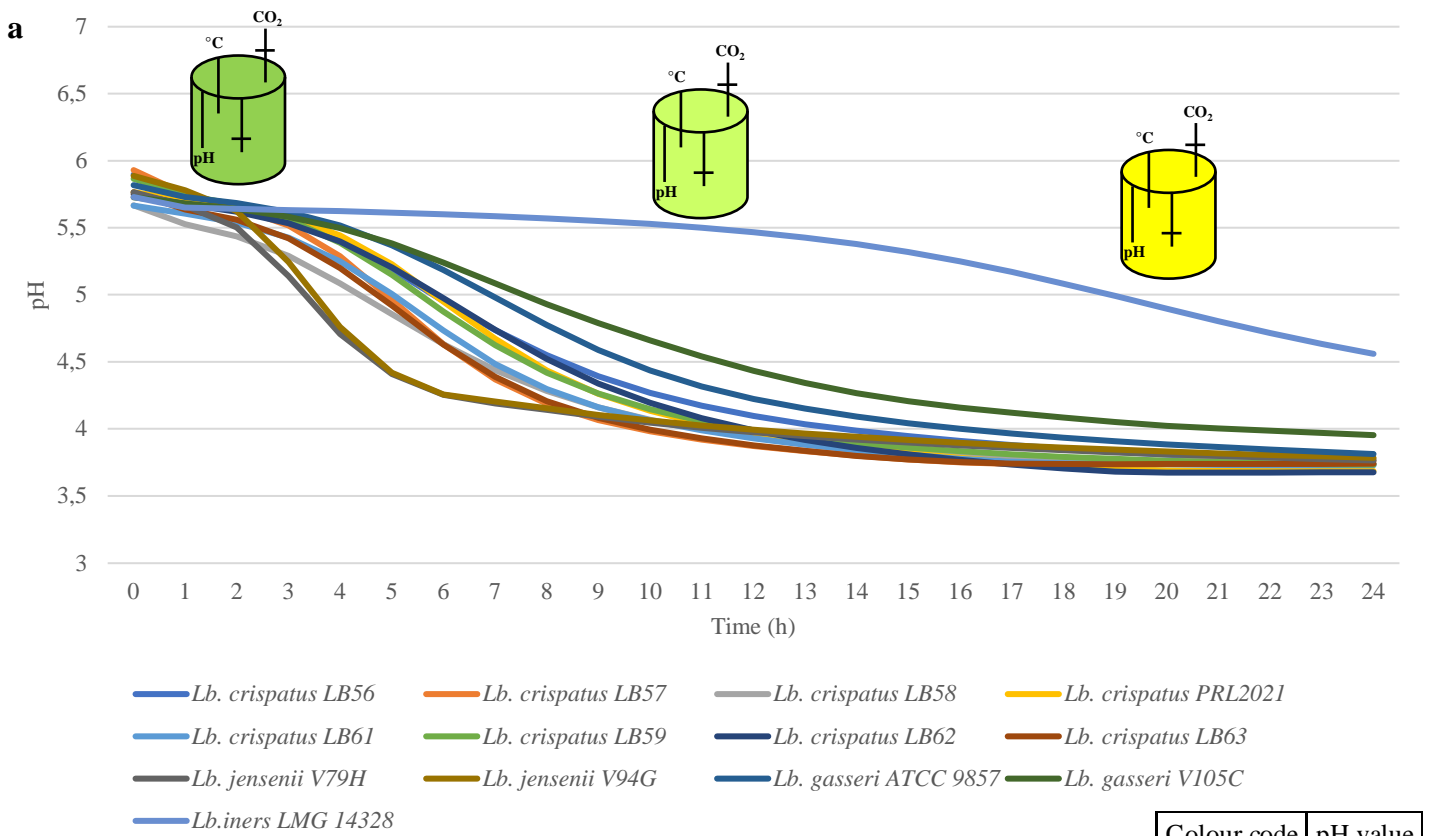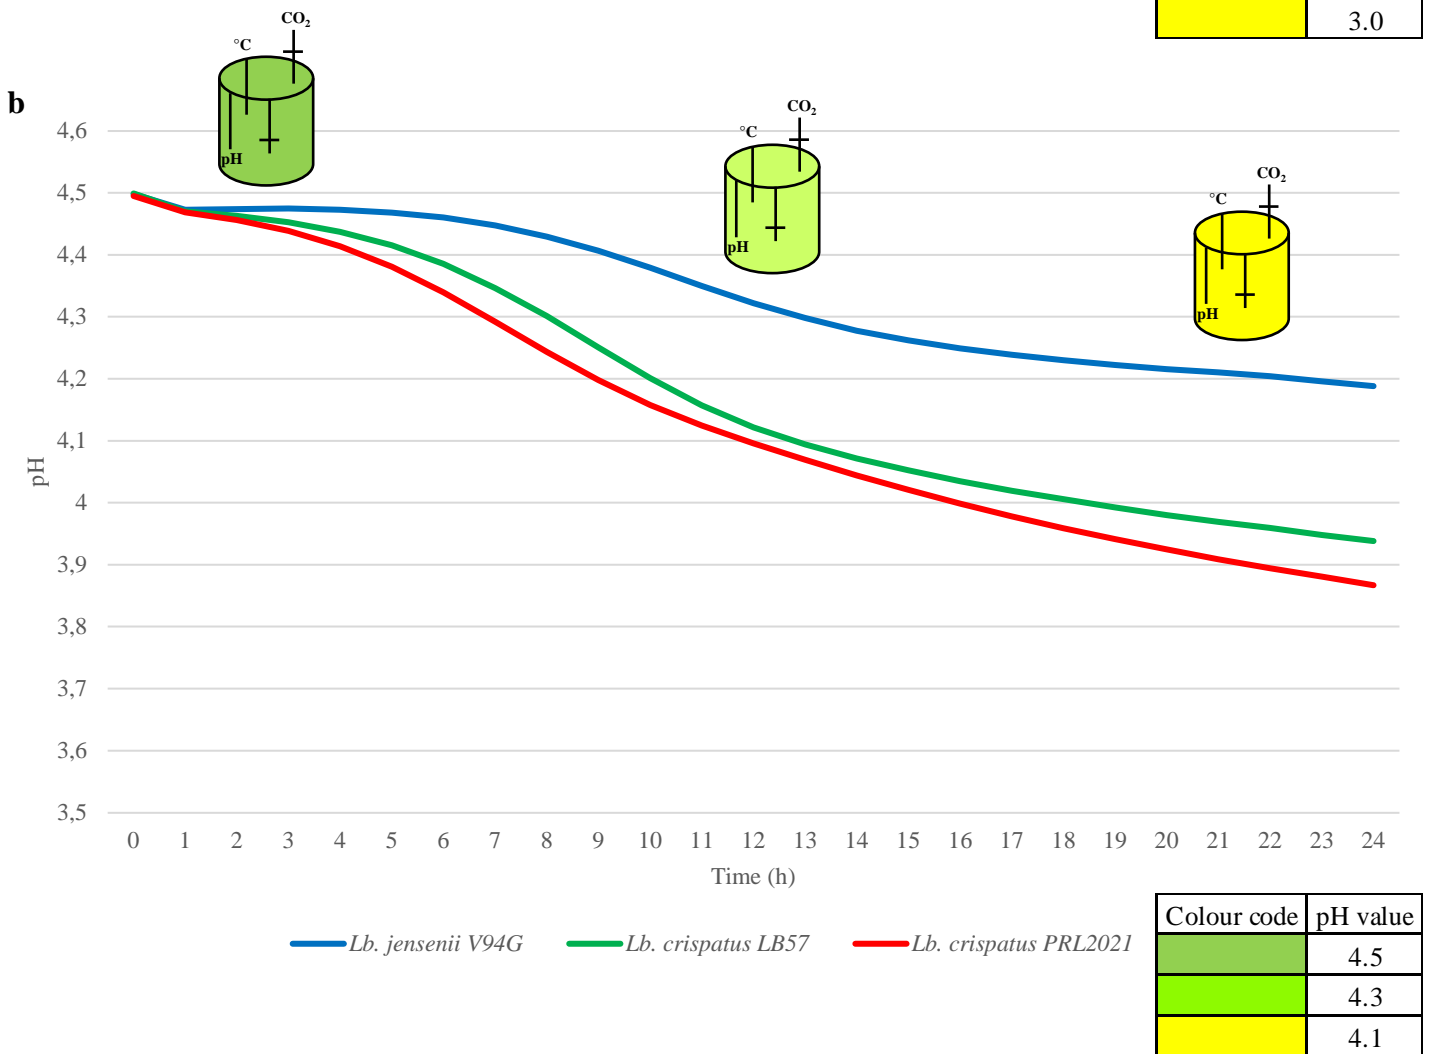

**Figure S3**

|             |   | SNPs analysis |     |     |     |     |     |
|-------------|---|---------------|-----|-----|-----|-----|-----|
| DH type     |   | DH1           |     |     | DH3 |     |     |
| Base number |   | 135           | 655 | 825 | 915 | 942 | 759 |
| LB62        | G | T             | T   | T   | T   | T   | A   |
| LB63        | G | T             | T   | T   | T   | T   | G   |
| LB58        | G | T             | T   | T   | T   | T   | G   |
| LB59        | G | T             | T   | T   | T   | T   | G   |
| LB57        | A | G             | C   | C   | C   | C   | G   |
| LB61        | A | G             | C   | C   | C   | C   | G   |
| PRL2021     | G | G             | C   | C   | C   | C   | G   |
| LB56        | G | G             | C   | C   | C   | C   | G   |



| AA substitution | D        | D       | D        | D        | Y        | Y        | Y        | Y        |
|-----------------|----------|---------|----------|----------|----------|----------|----------|----------|
| SNPs            | T        | T       | T        | T        | G        | G        | G        | G        |
| Hours           | PRL2021  | LB56    | LB61     | LB57     | LB58     | LB59     | LB63     | LB62     |
| 0               | 5.766805 | 5.89645 | 5.666625 | 5.93095  | 5.66703  | 5.866285 | 5.76248  | 5.75008  |
| 1               | 5.70809  | 5.73268 | 5.605935 | 5.751005 | 5.525155 | 5.743165 | 5.634885 | 5.67624  |
| 2               | 5.6583   | 5.6745  | 5.53725  | 5.649115 | 5.43512  | 5.67178  | 5.558415 | 5.618385 |
| 3               | 5.57904  | 5.57261 | 5.42669  | 5.51574  | 5.2899   | 5.56089  | 5.42215  | 5.533295 |
| 4               | 5.44218  | 5.40904 | 5.24976  | 5.2872   | 5.085535 | 5.386605 | 5.19885  | 5.396715 |
| 5               | 5.22695  | 5.18953 | 5.00504  | 4.96311  | 4.854435 | 5.149875 | 4.919025 | 5.204105 |
| 6               | 4.949475 | 4.95217 | 4.732485 | 4.63109  | 4.63129  | 4.87417  | 4.628135 | 4.974515 |
| Ph Excursion    | 0.81733  | 0.94428 | 0.93414  | 1.29986  | 1.03574  | 0.992115 | 1.134345 | 0.775565 |
| 7               | 4.67057  | 4.73466 | 4.483935 | 4.36832  | 4.43747  | 4.62313  | 4.386115 | 4.739225 |
| 8               | 4.435645 | 4.54851 | 4.29602  | 4.18756  | 4.28159  | 4.41868  | 4.205605 | 4.520535 |
| 9               | 4.26137  | 4.39263 | 4.16063  | 4.06571  | 4.161185 | 4.262245 | 4.082175 | 4.337365 |
| 10              | 4.13414  | 4.26818 | 4.061655 | 3.980915 | 4.06775  | 4.14523  | 3.994295 | 4.19322  |
| 11              | 4.039435 | 4.17148 | 3.98761  | 3.91935  | 3.995935 | 4.057    | 3.92962  | 4.07945  |
| 12              | 3.96656  | 4.09486 | 3.92936  | 3.8712   | 3.940075 | 3.988735 | 3.87749  | 3.989475 |
| Ph Excursion    | 1.800245 | 1.80159 | 1.737265 | 2.05975  | 1.726955 | 1.87755  | 1.88499  | 1.760605 |
| 13              | 3.90805  | 4.03474 | 3.8812   | 3.832235 | 3.896345 | 3.93558  | 3.835365 | 3.91764  |
| 14              | 3.860305 | 3.98509 | 3.84037  | 3.79926  | 3.859285 | 3.893585 | 3.797925 | 3.858235 |
| 15              | 3.819135 | 3.94451 | 3.80632  | 3.77141  | 3.829005 | 3.85991  | 3.771725 | 3.80925  |
| 16              | 3.784045 | 3.90874 | 3.77663  | 3.75026  | 3.804535 | 3.83261  | 3.75259  | 3.768415 |
| 17              | 3.75297  | 3.87842 | 3.75409  | 3.738365 | 3.785305 | 3.8101   | 3.74119  | 3.73382  |
| 18              | 3.725335 | 3.85147 | 3.742845 | 3.741965 | 3.77208  | 3.79125  | 3.737195 | 3.703765 |
| 19              | 3.702165 | 3.82818 | 3.738295 | 3.746865 | 3.767125 | 3.775195 | 3.736845 | 3.680825 |
| 20              | 3.68938  | 3.80656 | 3.73455  | 3.751995 | 3.763135 | 3.762155 | 3.736985 | 3.673875 |
| 21              | 3.687655 | 3.78752 | 3.731435 | 3.756    | 3.766565 | 3.75178  | 3.737775 | 3.67404  |
| 22              | 3.68785  | 3.77014 | 3.728865 | 3.760015 | 3.772115 | 3.74309  | 3.738765 | 3.67457  |
| 23              | 3.68693  | 3.75365 | 3.728865 | 3.76109  | 3.77556  | 3.73659  | 3.739235 | 3.67576  |
| 24              | 3.68556  | 3.73903 | 3.72942  | 3.76165  | 3.776195 | 3.73418  | 3.740185 | 3.676345 |
| Ph Excursion    | 2.081245 | 2.15742 | 1.93776  | 2.192585 | 1.903895 | 2.132105 | 2.025635 | 2.076205 |

Figure S4

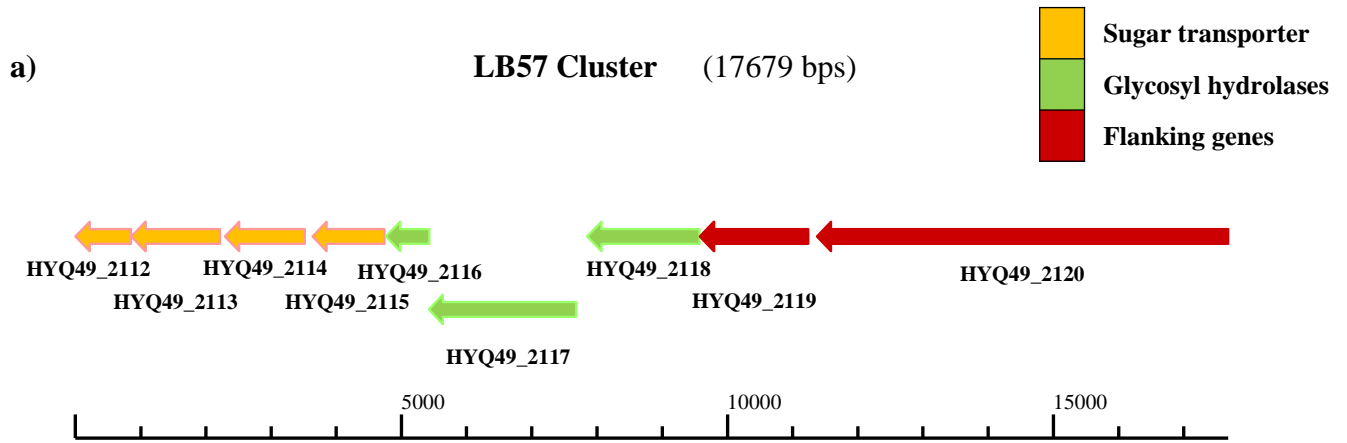

Genes involved in glycogen metabolism

| Gene ID    | Description                                 | HMMER analysis                  | Ind.    | Cond.   |
|------------|---------------------------------------------|---------------------------------|---------|---------|
| HYQ49_2120 | hypothetical protein                        |                                 |         |         |
| HYQ49_2119 | beta-phosphoglucomutase                     |                                 |         |         |
| HYQ49_2118 | alpha-glycosidase                           | Alpha amylase, catalytic domain |         |         |
| HYQ49_2117 | maltose phosphorylase                       |                                 |         |         |
| HYQ49_2116 | beta-phosphoglucomutase                     |                                 |         |         |
| HYQ49_2115 | sugar ABC transporter ATP-binding protein   |                                 |         |         |
| HYQ49_2114 | sugar ABC transporter sugar-binding protein |                                 | Ind.    | Cond.   |
| HYQ49_2113 | sugar ABC transporter permease              |                                 | 3.6e-76 | 3.7e-80 |
| HYQ49_2112 | sugar ABC transporter permease              |                                 |         |         |

Domain E-values

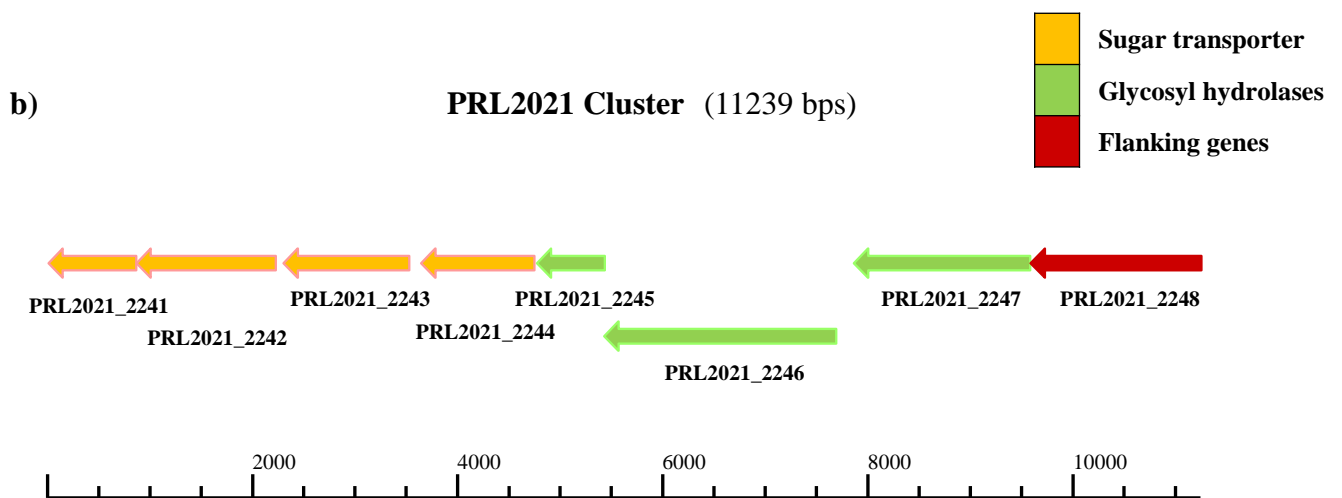

Genes involved in glycogen metabolism

| Gene ID      | Description                                                   |
|--------------|---------------------------------------------------------------|
| PRL2021_2248 | alpha,alpha-phosphotrehalase                                  |
| PRL2021_2247 | alpha-glycosidase                                             |
| PRL2021_2246 | maltose phosphorylase                                         |
| PRL2021_2245 | beta-phosphoglucomutase                                       |
| PRL2021_2244 | sugar ABC transporter ATP-binding protein                     |
| PRL2021_2243 | maltose ABC superfamily ATP-binding substrate-binding protein |
| PRL2021_2242 | sugar ABC transporter permease                                |
| PRL2021_2241 | sugar ABC transporter permease                                |

FigureS5

## Supplementary figure legends

### **Figure S1. Microbial biodiversity in the vaginal microbiota.**

Panel a reports the species richness analysis obtained through METAnnotatorX2 profiling of the 80 vaginal samples. Panel b shows the strain tracking result for the 4 *Lactobacillus* species analyzed in 80 vaginal samples, divided by CST I, II, III and V, through the use of strainGST software.

### **Figure S2. Analysis of bacteriocin gene distribution and correlation to inhibition halo.**

Panel a reports an HCl analysis relative to the distribution of the six bacteriocin clusters (LCB) between the analyzed strains of *Lb. crispatus*, while panel b) shows correlation of the presence of the six different LCB and the inhibition halo of *Lb. crispatus* grown with the nine species used as test.

### **Figure S3. Evaluation of lactic acid production by vaginal lactobacilli.**

Panel a displays the pH lowering through fermentation process in MRS. The variation of pH as a function of time is reported. Panel b) shows the evaluation of lactic acid production through fermentation process in Simulated Vaginal Fluid (SVF). The variation of pH as a function of time is reported.

### **Figure S4. SNP analysis in DH genes.**

The figure reports all five SNPs identified in the DH1 gene and the single SNP identified in the DH3 gene, with the relative NT substitution. Additionally, for the SNP at position 655 in the DH1 gene, is reported also the relative AA substitution, correlated to pH profile of each *Lb. crispatus* genome isolated from human vagina.

### **Figure S5. Cluster of genes for glycogen metabolism in *Lactobacillus crispatus*.**

The figure shows the cluster of genes involved in glycogen metabolism conserved within the *Lactobacillus crispatus* strains DH used in the growth assays. Panels a) and b) show the genes present within the conserved cluster for glycogen metabolism both in LB57 and PRL2021 strains.
